# Supplementary material for: Exploring the Diversity and Antibacterial Potentiality of Cultivable Actinobacteria from the Soil of the Saxaul Forest in Southern Gobi Desert in Mongolia
Source: MDPI journal article supplement (doi:10.3390/microorganisms10050989), 2022-05-09

# Exploring the Diversity and Antibacterial Potentiality of Cultivable Actinobacteria from the Soil of the Saxaul Forest in Southern Gobi Desert in Mongolia

Shao-Wei Liu <sup>1</sup>, Norovsuren Jadambaa <sup>2</sup>, Arina A. Nikandrova <sup>3,4</sup>, Ilya A. Osterman <sup>3,5,6</sup> and Cheng-Hang Sun <sup>1,\*</sup>

<sup>1</sup> Department of Microbial Chemistry and Beijing Key Laboratory of Antimicrobial Agents, Institute of Medicinal Biotechnology, Chinese Academy of Medical Sciences & Peking Union Medical College, Beijing 100050, China; liushaowei3535@163.com

<sup>2</sup> The Institute of Biology, Mongolian Academy of Sciences, Ulaanbaatar 13330, Mongolia; norvo@mail.ru

<sup>3</sup> Center of Life Sciences, Skolkovo Institute of Science and Technology, Moscow 143028, Russia; arinanikandrova@mail.ru (A.A.N.); i.osterman@skoltech.ru (I.A.O.)

<sup>4</sup> Department of Soil Science, Lomonosov Moscow State University, Moscow 119991, Russia

<sup>5</sup> Department of Chemistry, Lomonosov Moscow State University, Moscow 119991, Russia

<sup>6</sup> Genetics and Life Sciences Research Center, Sirius University of Science and Technology, Sochi 354340, Russia

\* Correspondence: chenghangsun@hotmail.com

## Content

**Table S1.** Compositions of the ten different media used for the isolation of actinobacteria in the study.

**Table S2.** Taxonomic statistics of the isolated 172 actinobacterial strains.

**Table S3.** Antibacterial activity of 23 strains isolated from soil of the saxaul forest in southern Gobi Desert in Mongolia.

**Figure S1.** Neighbor-joining phylogenetic tree based on 16S rRNA gene sequences of five potential novel strains.

**Figure S2.** UPLC-MS/MS spectra of the putative granaticin A (compound **1**) from strain MGa5-5 and the authentic standard of granaticin A.

**Figure S3.** UPLC-UV-HRMS/MS spectra and identification of bioactive compounds from EA extract of strain MGa2-5.

**Figure S4.** UPLC-UV-HRMS/MS spectra and identification of bioactive compounds from EA extract of strain MGa1-3.

**Figure S5.** UPLC-MS/MS spectra of the putative chloramphenicol (compound **5**) from strain MGa1-3 and the authentic standard of chloramphenicol.

**Figure S6.** UPLC-MS/MS spectra acquired by MS<sup>E</sup> method and possible fragmentation patterns of putative granaticin compounds (**6-10**) from strain MGa5-5.

**Figure S7.** UPLC-MS/MS spectra acquired by MS<sup>E</sup> method and possible fragmentation patterns of putative chloramphenicol derivatives (**11-13**) from strain MGa1-3.

**Figure S8.** UPLC-MS/MS spectra acquired by MS<sup>E</sup> method and possible fragmentation patterns of putative althiomycin compounds (**14-16**) from strain MGa2-5.

**Table S1.** Compositions of the ten different media used for the isolation of actinobacteria in the study.

| NO. | Name                                             | Composition (In 1.0 L distilled water)                                                                                                                                                                                                                                                                    |
|-----|--------------------------------------------------|-----------------------------------------------------------------------------------------------------------------------------------------------------------------------------------------------------------------------------------------------------------------------------------------------------------|
| M1  | Modified Gauze's NO. 1 synthetic medium          | Starch 2.0 g, KNO <sub>3</sub> 0.5 g, KCl 1.7 g, MgSO <sub>4</sub> •7H <sub>2</sub> O 0.5 g, Na <sub>2</sub> HPO <sub>4</sub> 0.5 g, NaCl 0.5g, CaCO <sub>3</sub> 0.02 g, FeSO <sub>4</sub> •7H <sub>2</sub> O 0.01 g, Vitamin mixture <sup>a</sup> 1.0 mL, Agar 20.0 g, pH 8.0                           |
| M2  | ISP 2 medium                                     | Yeast extract 4.0 g, Glucose 4.0 g, Malt extract 5.0 g, Vitamin mixture <sup>a</sup> 1.0 mL, Trace salt <sup>b</sup> 1.0 mL, Agar 20.0 g, pH 8.0                                                                                                                                                          |
| M3  | R2A medium                                       | R2A (BD) 18.6 g, Agar 12.0 g, pH 8.0                                                                                                                                                                                                                                                                      |
| M4  | Modified Cellulose-Casein medium                 | Cellulose 10.0 g, Casein 0.3 g, K <sub>2</sub> HPO <sub>4</sub> 0.2 g, FeSO <sub>4</sub> •7H <sub>2</sub> O 0.01 g, CaCO <sub>3</sub> 0.02 g, KNO <sub>3</sub> 2.0 g, MgSO <sub>4</sub> •7H <sub>2</sub> O 0.05 g, NaCl 10g, Agar 20.0 g, pH 8.0                                                          |
| M5  | CMKA medium                                      | Casein acids hydrolysate 0.5 g, Mannitol 1.5g, KNO <sub>3</sub> 1.0 g, (NH <sub>4</sub> ) <sub>2</sub> SO <sub>4</sub> 2.0 g, K <sub>2</sub> HPO <sub>4</sub> 0.5g, CaCO <sub>3</sub> 0.5g, NaCl 10.0 g, KCl 5.0g, MgCl <sub>2</sub> 1.0 g, Agar 20.0 g, pH 8.0                                           |
| M6  | Raffinose-Histidine medium                       | Raffinose 1.0 g, Histidine 0.1 g, Na <sub>2</sub> HPO <sub>4</sub> 0.5 g, KCl 1.7g, MgSO <sub>4</sub> •7H <sub>2</sub> O 0.05 g, FeSO <sub>4</sub> •7H <sub>2</sub> O 0.1 g, CaCO <sub>3</sub> 0.02 g, Vitamin mixture <sup>a</sup> 1.0 mL, Agar 20.0 g, pH 8.0                                           |
| M7  | Trehalose-Proline medium                         | Trehalose 5.0 g, L-Proline 1.0 g, (NH <sub>4</sub> ) <sub>2</sub> SO <sub>4</sub> 1.0 g, CaCl <sub>2</sub> 2.0 g, NaCl 1.0 g, K <sub>2</sub> HPO <sub>4</sub> 1.0 g, MgSO <sub>4</sub> •7H <sub>2</sub> O 1.0 g, Vitamin mixture <sup>a</sup> 1.0 mL, Agar 20.0 g, pH 8.0                                 |
| M8  | Proline medium                                   | L-Proline 5.0 g, Agar 20.0 g, Distilled water 1.0 L, pH 8.0                                                                                                                                                                                                                                               |
| M9  | Casein-Glucose medium                            | Casein 0.3 g, Glucose 10.0 g, KNO <sub>3</sub> 2.0g, MgSO <sub>4</sub> •7H <sub>2</sub> O 0.05 g, K <sub>2</sub> HPO <sub>4</sub> 2.0 g, CaCl <sub>2</sub> 1.0 g, FeSO <sub>4</sub> •7H <sub>2</sub> O 0.01 g, NaCl 50.0 g, KCl 20.0 g, MgCl <sub>2</sub> •6H <sub>2</sub> O 10.0 g, Agar 20.0 g, pH 8.0  |
| M10 | Casein-Glucose medium with 16% (w/v) multi-salts | Casein 0.3 g, Glucose 10.0 g, KNO <sub>3</sub> 2.0g, MgSO <sub>4</sub> •7H <sub>2</sub> O 0.05 g, K <sub>2</sub> HPO <sub>4</sub> 2.0 g, CaCl <sub>2</sub> 1.0 g, FeSO <sub>4</sub> •7H <sub>2</sub> O 0.01 g, NaCl 100.0 g, KCl 40.0 g, MgCl <sub>2</sub> •6H <sub>2</sub> O 20.0 g, Agar 20.0 g, pH 8.0 |

Note: <sup>a</sup> Vitamin mixture: thiamine 0.1 g, pyridoxine 0.1 g, riboflavin 0.1g, niacin 0.1 g, biotin 0.1 g, distilled water 100.0 mL.

<sup>b</sup> Trace salt solution: FeSO<sub>4</sub>•7H<sub>2</sub>O 0.2 g, MnCl<sub>2</sub>•4H<sub>2</sub>O 0.01 g, ZnSO<sub>4</sub>•7H<sub>2</sub>O 0.01 g, distilled water 100.0 mL.

**Table S2.** Taxonomic statistics of the isolated 172 actinobacterial strains.

| Taxon                                    |                           |                          | No. of isolates |
|------------------------------------------|---------------------------|--------------------------|-----------------|
| Order (7)                                | Family (13)               | Genus (22)               |                 |
| <i>Streptomycetales</i>                  | <i>Streptomycetaceae</i>  | <i>Streptomyces</i>      | 73              |
| <i>Micrococcales</i>                     | <i>Microbacteriaceae</i>  | <i>Agromyces</i>         | 23              |
|                                          |                           | <i>Labeledella</i>       | 6               |
|                                          |                           | <i>Microbacterium</i>    | 2               |
|                                          |                           | <i>Agrococcus</i>        | 1               |
|                                          |                           | <i>Kocuria</i>           | 17              |
|                                          | <i>Micrococcaceae</i>     | <i>Nesterenkonia</i>     | 13              |
|                                          |                           | <i>Arthrobacter</i>      | 4               |
|                                          |                           | <i>Citricoccus</i>       | 4               |
|                                          |                           | <i>Isoptricola</i>       | 7               |
|                                          |                           | <i>Promicromonospora</i> | 2               |
|                                          |                           | <i>Krasilnikovella</i>   | 1               |
|                                          | <i>Dermabacteraceae</i>   | <i>Brachybacterium</i>   | 2               |
|                                          | <i>Bogoriellaceae</i>     | <i>Georgenia</i>         | 1               |
|                                          | <i>Gordoniaceae</i>       | <i>Gordonia</i>          | 4               |
|                                          |                           | <i>Williamsia</i>        | 1               |
|                                          | <i>Nocardiaceae</i>       | <i>Rhodococcus</i>       | 4               |
|                                          | <i>Mycobacteriaceae</i>   | <i>Mycobacterium</i>     | 2               |
| <i>Streptosporangiales</i>               | <i>Nocardiopsaceae</i>    | <i>Nocardiopsis</i>      | 2               |
| <i>Propionibacteriales</i>               | <i>Nocardioidaceae</i>    | <i>Aeromicrobium</i>     | 1               |
| <i>Micromonosporales</i>                 | <i>Micromonosporaceae</i> | <i>Micromonospora</i>    | 1               |
| <i>Glycomycetales</i>                    | <i>Glycomycetaceae</i>    | <i>Glycomyces</i>        | 1               |
| Total number of actinobacterial isolates |                           |                          | 172             |

**Table S3.** Antibacterial activity of 23 strains isolated from soil of the saxaul forest in southern Gobi Desert in Mongolia.

[illegible]

[illegible]

|    |            |                                      |   |     |     |     |   |     |     |     |     |     |     |     |     |     |
|----|------------|--------------------------------------|---|-----|-----|-----|---|-----|-----|-----|-----|-----|-----|-----|-----|-----|
|    | (OM943737) | 90018 <sup>T</sup> , 99.8%           | W | —   | —   | —   | — | —   | —   | —   | —   | —   | 0.8 | 0.7 | —   | —   |
|    |            |                                      | M | —   | —   | —   | — | —   | —   | —   | —   | —   | —   | —   | —   | —   |
| 17 | MGb9-13    | <i>Streptomyces sparsus</i> YIM      | E | —   | —   | —   | — | —   | —   | —   | —   | —   | 0.7 | —   | —   | 2.8 |
|    | (OM943738) | 90018 <sup>T</sup> , 99.8%           | W | —   | —   | —   | — | —   | —   | —   | —   | —   | —   | —   | 1.5 | 1.8 |
|    |            |                                      | M | —   | —   | —   | — | —   | —   | —   | —   | —   | —   | 1.0 | —   | 1.0 |
| 18 | MGc5-5     | <i>Streptomyces tuirus</i> NBRC      | E | —   | —   | —   | — | —   | —   | —   | —   | —   | 0.9 | 0.8 | 1.1 | 1.5 |
|    | (OM943739) | 15617 <sup>T</sup> , 99.5%           | W | —   | —   | —   | — | —   | —   | —   | —   | —   | —   | —   | —   | —   |
|    |            |                                      | M | —   | —   | —   | — | —   | —   | —   | —   | —   | —   | —   | —   | —   |
| 19 | MGa5-5     | <i>Streptomyces lateritius</i> LMG   | E | —   | —   | —   | — | —   | —   | 0.7 | 0.7 | 1.2 | 1.4 | 2.3 | 0.9 | 2.0 |
|    | (OM943740) | 19372 <sup>T</sup> , 99.7%           | W | —   | —   | —   | — | —   | —   | —   | —   | 0.7 | 1.2 | 1.3 | —   | —   |
|    |            |                                      | M | —   | —   | —   | — | —   | —   | —   | —   | —   | —   | —   | —   | —   |
| 20 | MGc2-5     | <i>Streptomyces huasconensis</i>     | E | —   | —   | —   | — | —   | —   | —   | —   | —   | 1.8 | —   | —   | —   |
|    | (OM943741) | HST28 <sup>T</sup> , 99.5%           | W | —   | —   | —   | — | —   | —   | —   | —   | —   | 1.2 | 1.5 | —   | —   |
|    |            |                                      | M | —   | —   | —   | — | —   | —   | —   | —   | —   | 1.5 | 1.8 | —   | —   |
| 21 | MGa1-3     | <i>Streptomyces venezuelae</i> ATCC  | E | 1.8 | 1.6 | 1.7 | — | 2.0 | 1.5 | 1.2 | 1.3 | 2.0 | 0.9 | 1.3 | 2.1 |     |
|    | (OM943745) | 10712 <sup>T</sup> , 99.7%           | W | —   | —   | —   | — | —   | —   | —   | —   | —   | —   | —   | —   | —   |
|    |            |                                      | M | —   | —   | —   | — | 0.9 | —   | —   | —   | —   | —   | —   | —   | —   |
| 22 | MGc5-6     | <i>Streptomyces coeruleoprunus</i>   | E | —   | —   | —   | — | 1.1 | —   | —   | —   | —   | 0.9 | —   | —   | —   |
|    | (OM943742) | NBRC 15400 <sup>T</sup> , 99.6%      | W | —   | —   | —   | — | —   | —   | —   | —   | —   | —   | —   | —   | —   |
|    |            |                                      | M | —   | —   | —   | — | —   | —   | —   | —   | —   | —   | —   | —   | —   |
| 23 | MGa2-5     | <i>Streptomyces althioticus</i> NRRL | E | —   | —   | —   | — | 2.0 | —   | —   | —   | —   | 0.8 | 1.3 | 0.7 | 1.4 |
|    | (OM943743) | B-3981 <sup>T</sup> , 98.8%          | W | —   | —   | —   | — | —   | —   | —   | —   | —   | —   | —   | —   | —   |
|    |            |                                      | M | —   | —   | —   | — | —   | —   | —   | —   | —   | —   | —   | —   | —   |

<sup>a</sup> E: crude sample extracted with ethyl acetate; M: crude sample from mycelium; W: crude sample from water layer.

<sup>b</sup> The diameters of the inhibition zones: cm; —, no inhibition.

**Figure S1.** Neighbor-joining phylogenetic tree based on 16S rRNA gene sequences of five potential novel strains. Numbers at nodes indicate the level of bootstrap support (> 50%) based on 1000 replications. Bar, 2 nt substitutions per 100 nt.

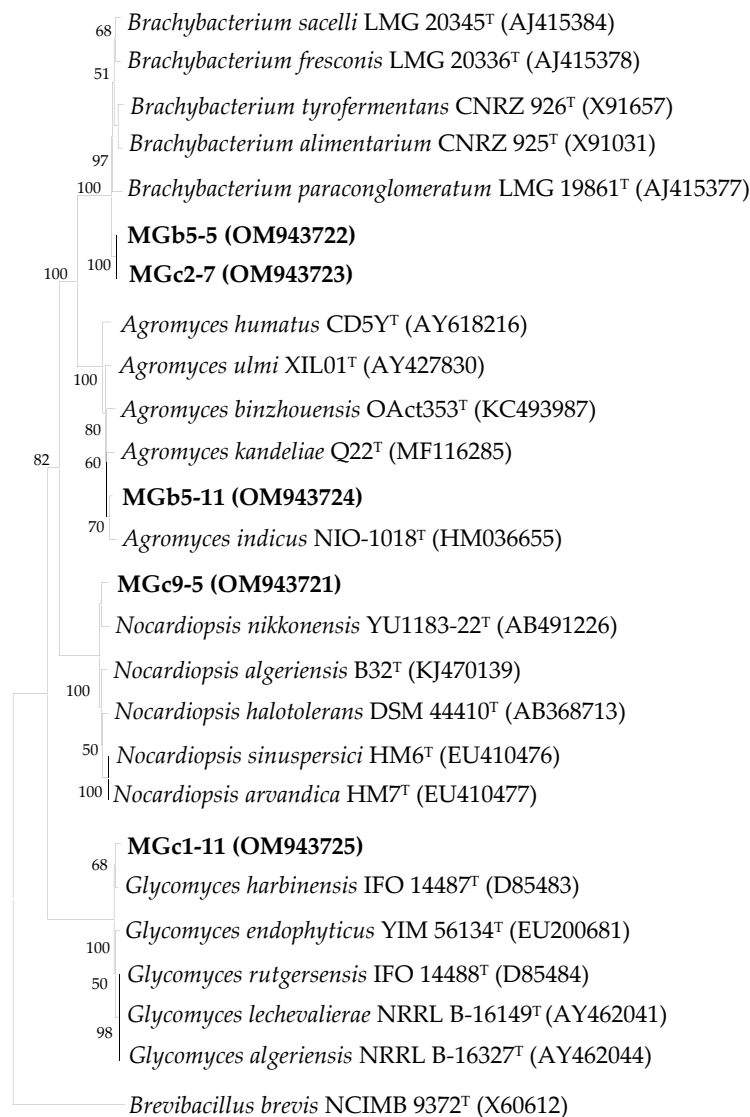

0.02



**Figure S2.** UPLC-MS/MS spectra of the putative granaticin A (compound **1**) from strain MGa5-5 and the authentic standard of granaticin A. **(A)** TIC plots of the TLC band ( $R_f$  0.71-0.79) from the ethyl acetate of cultural broth of strain MGa5-5 and authentic granaticin A. **(B)** MS/MS spectra of the putative granaticin A (**1**) and authentic granaticin A.

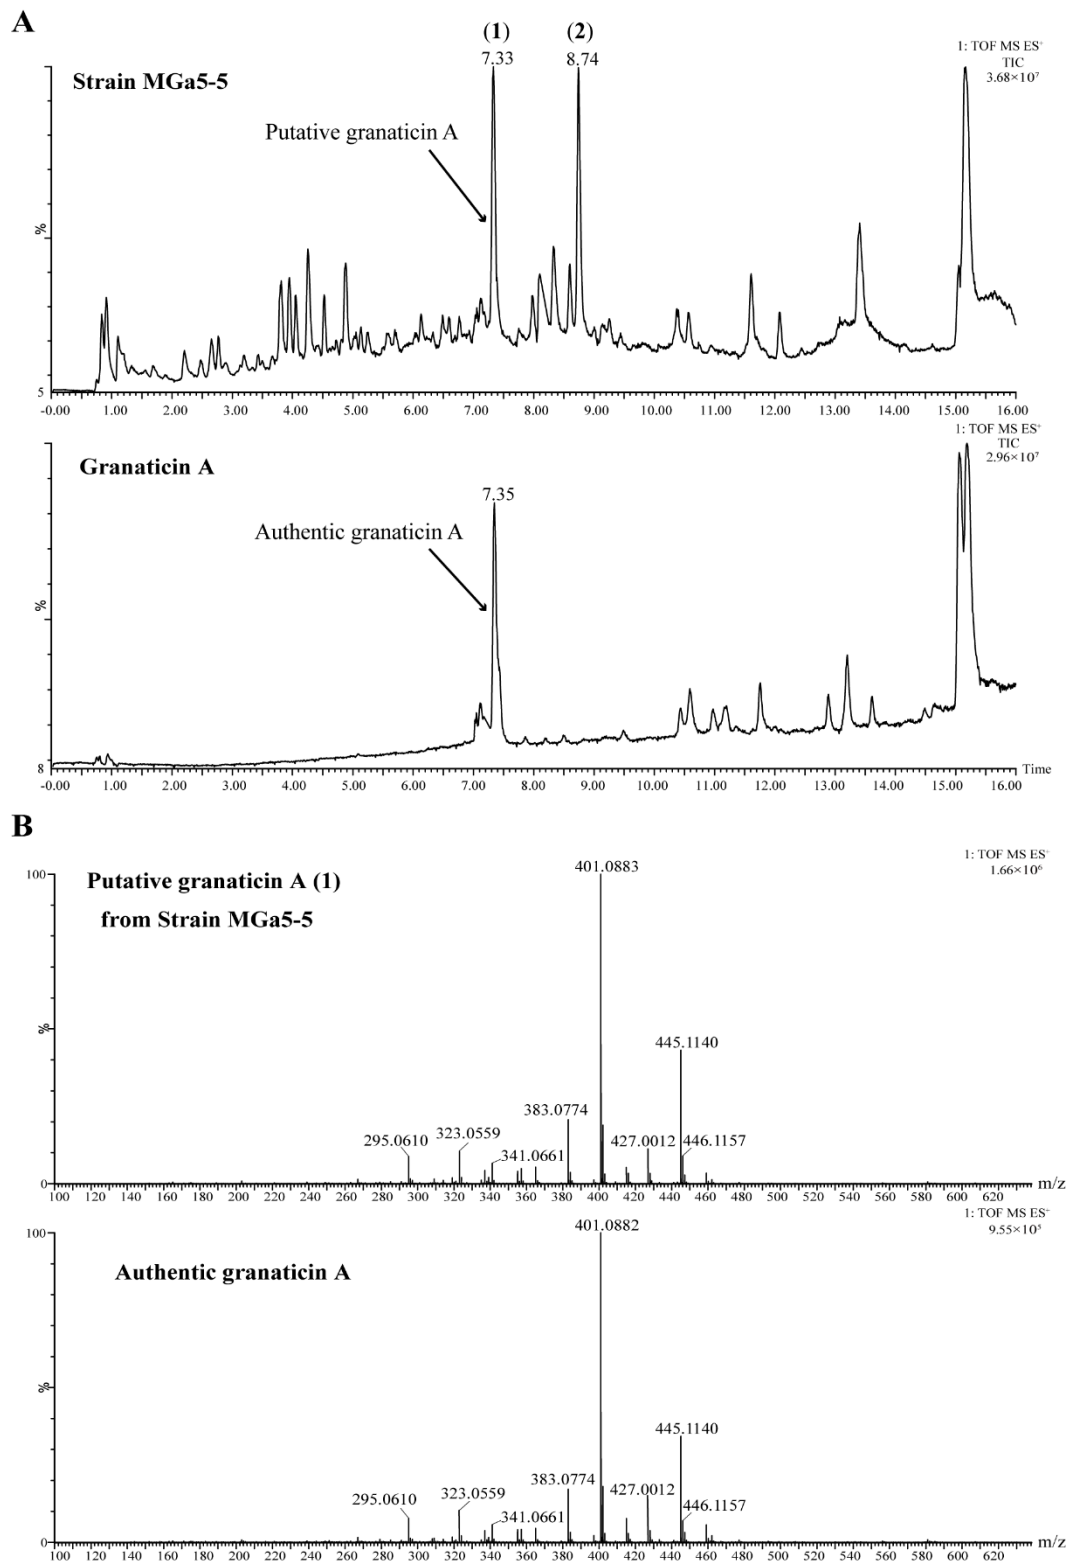

**Figure S3.** UPLC-UV-HRMS/MS spectra and identification of bioactive compounds from EA extract of strain MGa2-5. (A) UPLC-UV chromatogram at 254 nm of the bioactive TLC band ( $R_f$  0.62) extracted from strain MGa2-5, and one major compound (peak 3) was labelled in the UPLC spectrum. (B) TIC plot of the bioactive TLC band ( $R_f$  0.62) extracted from strain MGa2-5. (C) MS/MS spectrum and the annotated fragmentation pattern of peak 3 (althiomycin).

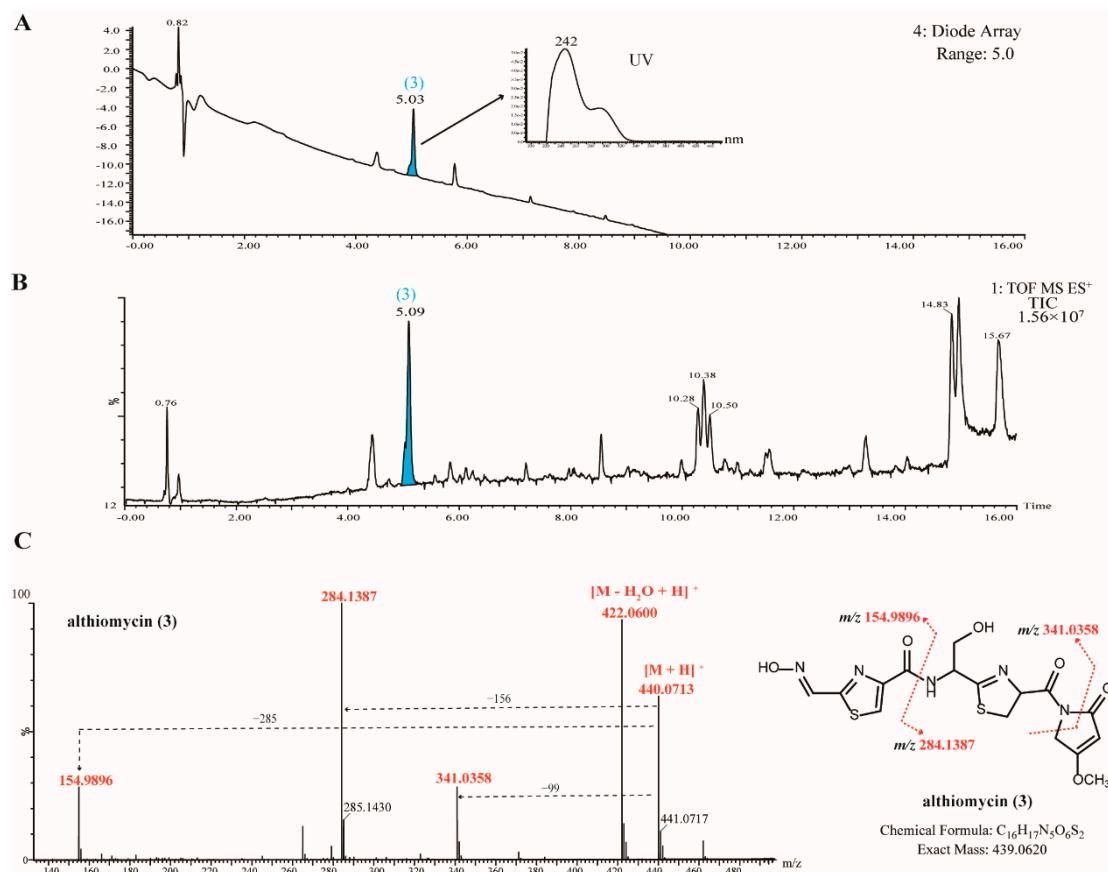

**Figure S4.** UPLC-UV-HRMS/MS spectra and identification of bioactive compounds from EA extract of strain MGa1-3. (A) UPLC-UV chromatogram at 280 nm of the bioactive TLC band ( $R_f$  0.63) extracted from strain MGa1-3, and two major compounds (peak 4 and 5) were labelled in the UPLC spectrum. (B) TIC plot of the bioactive TLC band ( $R_f$  0.63) extracted from strain MGa1-3. (C) MS/MS spectra and the annotated fragmentation patterns of peak 4 (corynecin III) and 5 (chloramphenicol).

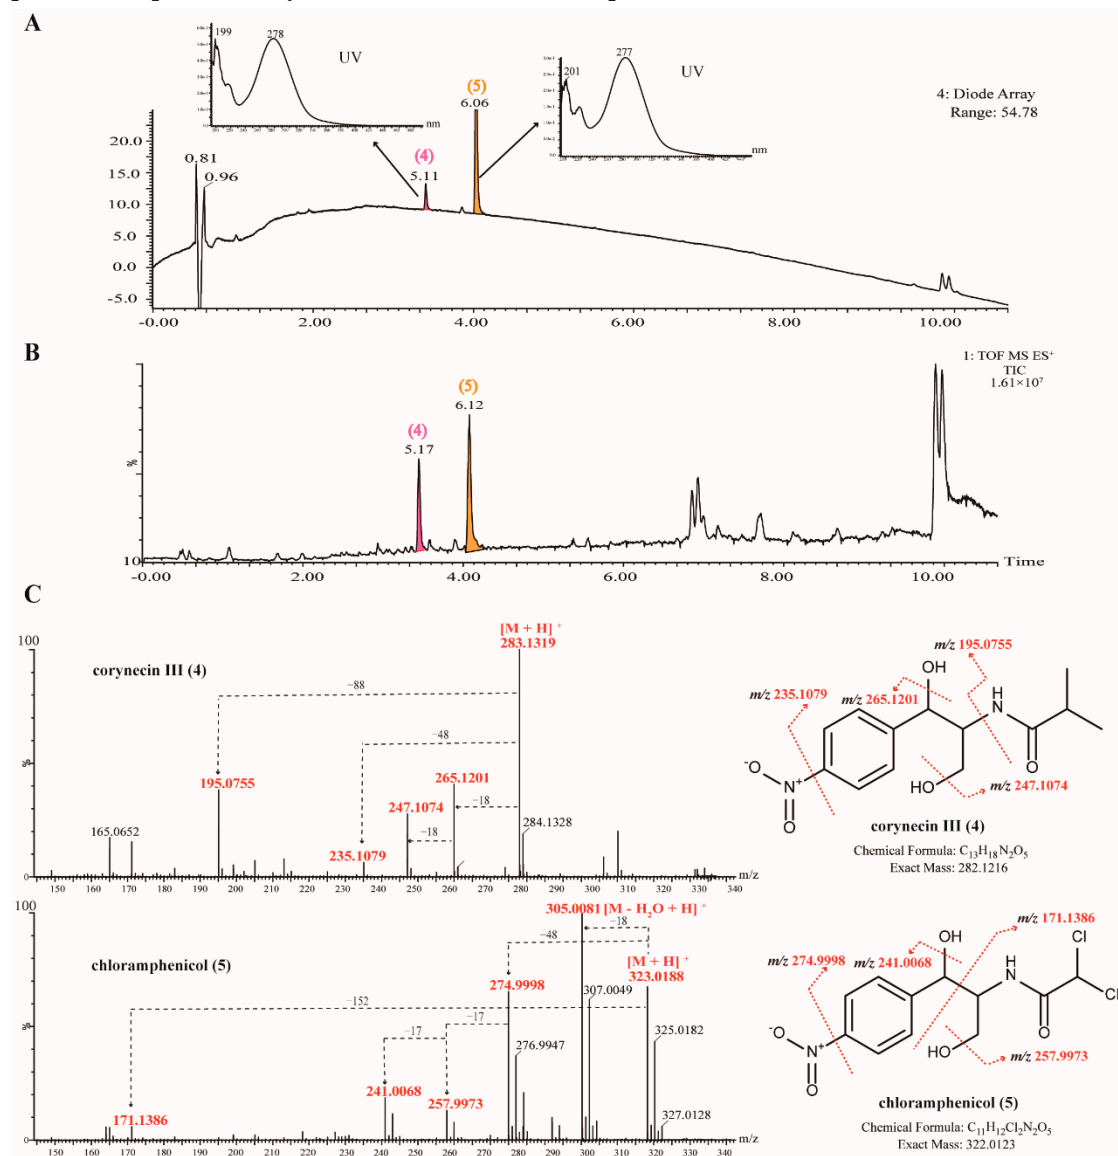

**Figure S5.** UPLC-MS/MS spectra of the putative chloramphenicol (compound 5) from strain MGa1-3 and the authentic standard of chloramphenicol. **(A)** TIC plots of the TLC band ( $R_f$  0.63) from the ethyl acetate of cultural broth of strain MGa1-3 and authentic chloramphenicol. **(B)** MS/MS spectra of the putative chloramphenicol (5) and authentic chloramphenicol.

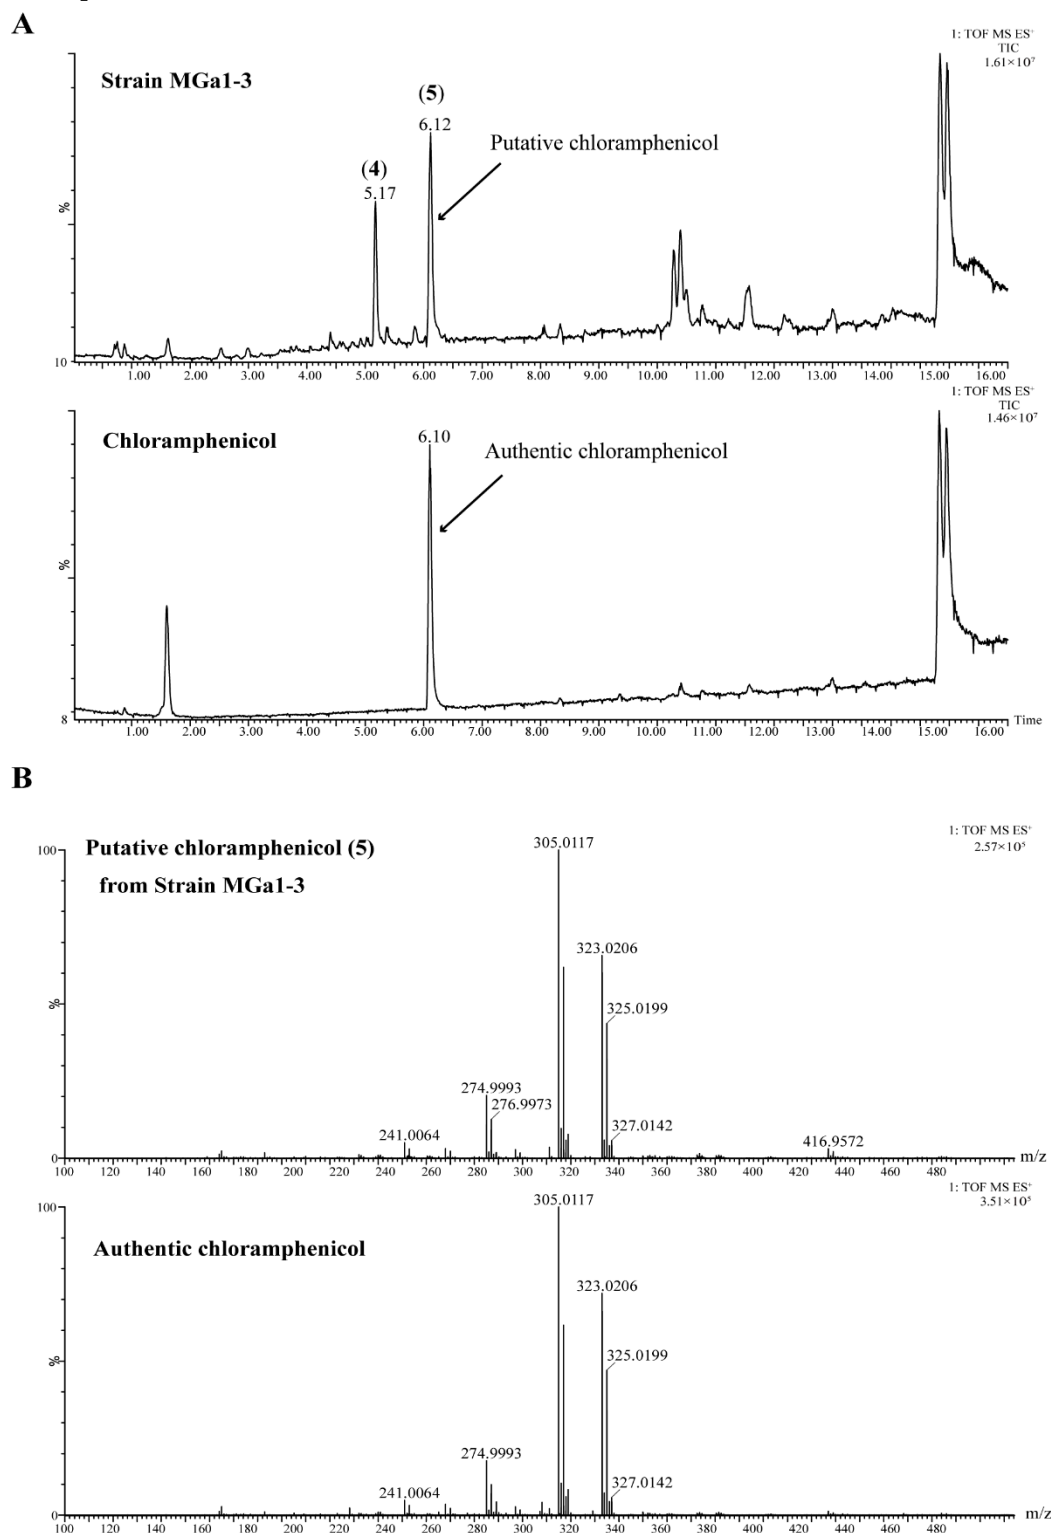

**Figure S6.** UPLC-MS/MS spectra acquired by MSE method and possible fragmentation patterns of putative granaticin compounds (6-10) from strain MGa5-5. (A) TIC plot of the ethyl acetate extract from the cultural broth of strain MGa5-5. (B) MS/MS spectra of five putative granaticin compounds 6-10 and possible fragmentation patterns of compounds 6-8.

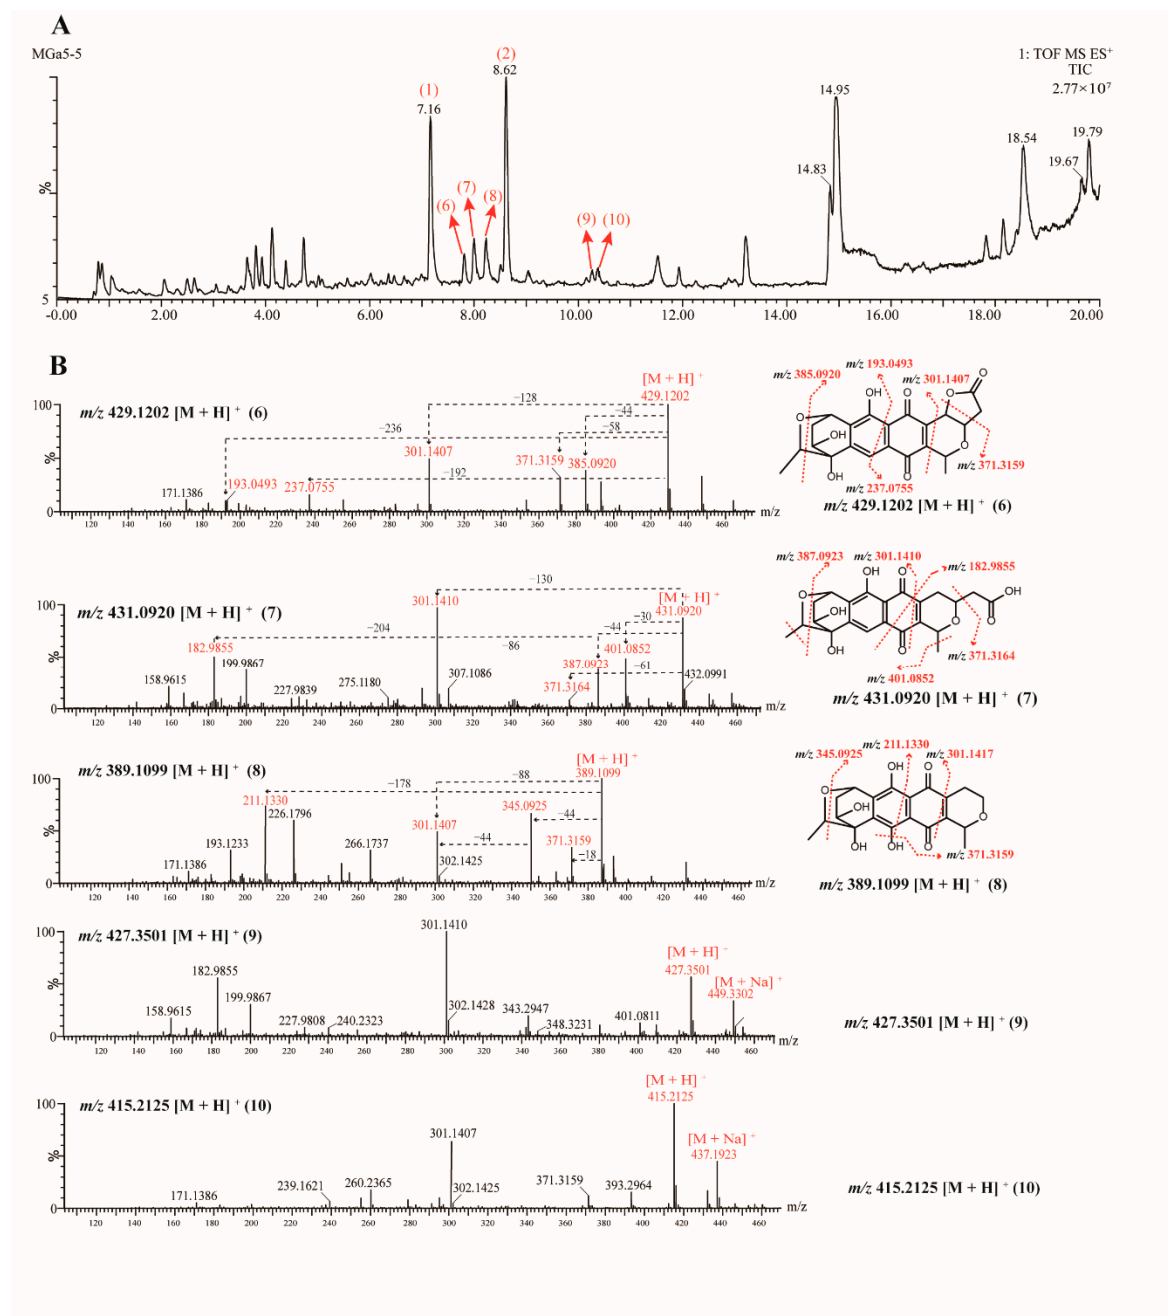

**Figure S7.** UPLC-MS/MS spectra acquired by MS<sup>E</sup> method and possible fragmentation patterns of putative chloramphenicol derivatives (**11-13**) from strain MGa1-3. (A) TIC plot of the ethyl acetate extract from the cultural broth of strain MGa1-3. (B) MS/MS spectra and possible fragmentation patterns of three putative chloramphenicol derivatives **11-13**.

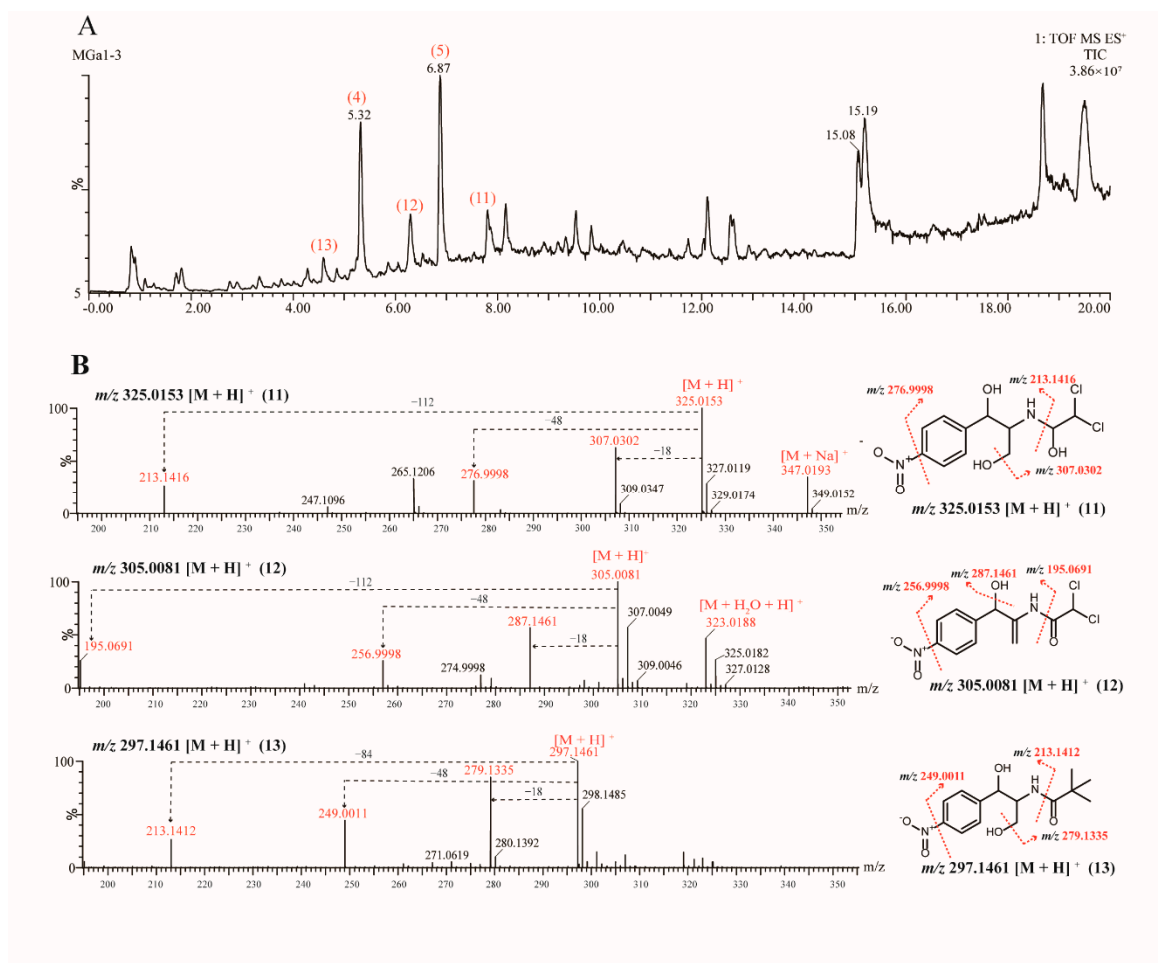

**Figure S8.** UPLC-MS/MS spectra acquired by MSE method and possible fragmentation patterns of putative althiomycin compounds (**14-16**) from strain MGa2-5. **(A)** TIC plot of the ethyl acetate extract from the cultural broth of strain MGa2-5. **(B)** MS/MS spectra of three putative althiomycin compounds **14-16** and possible fragmentation patterns of compounds **14-15**.

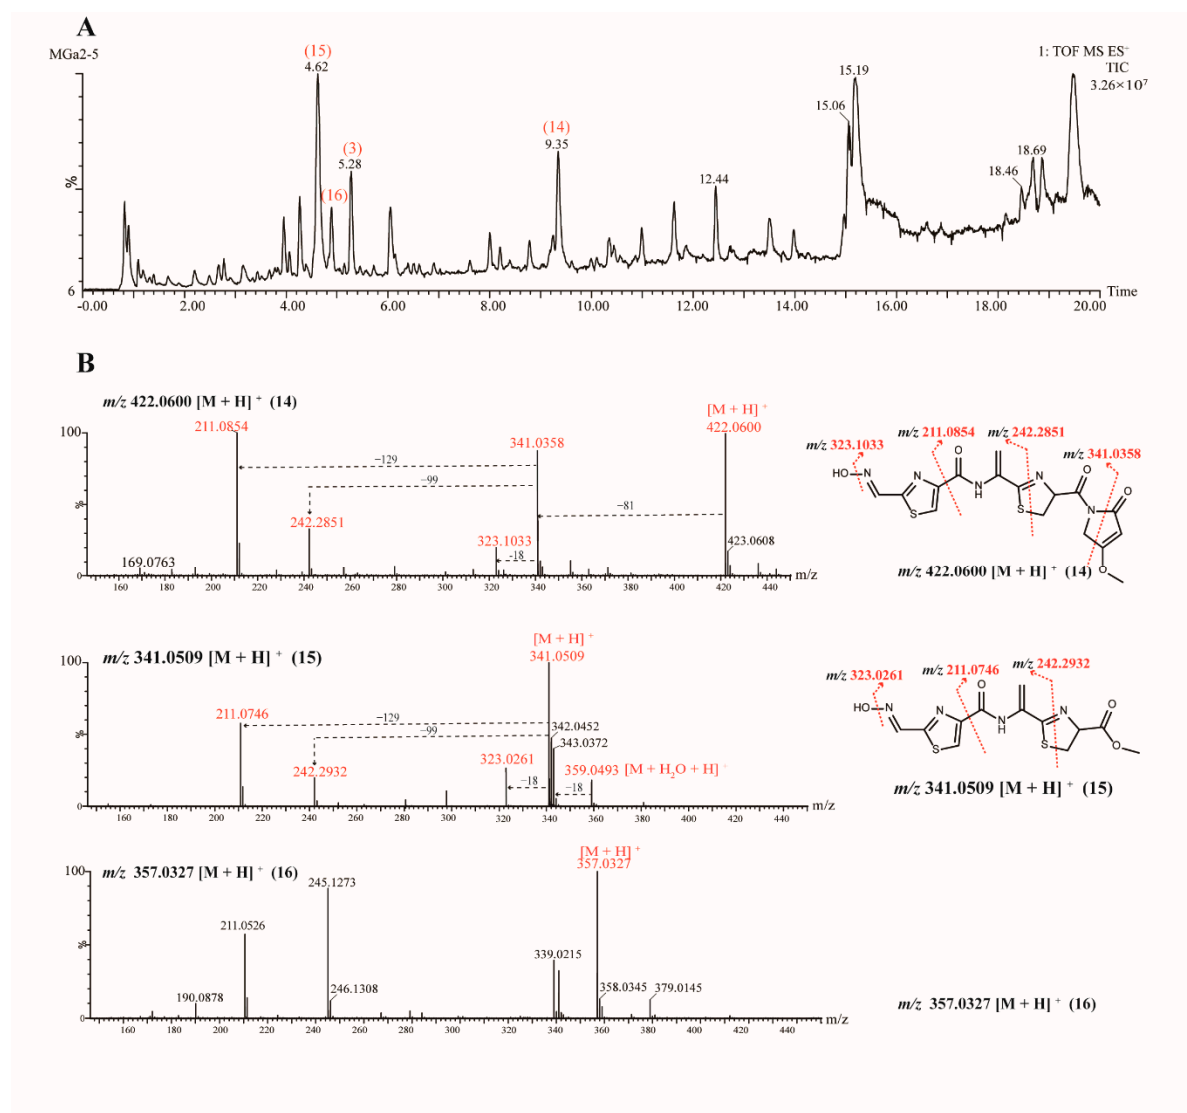

Supplement: s1 [file s1]
